# Supplementary material for: Soft, flexible pressure sensors for pressure monitoring under large hydrostatic pressure and harsh ocean environments
Source: Royal Society of Chemistry journal article supplement (doi:10.1039/d3sm00563a), 2023-01-01
Supplement: d3sm00563a1.pdf [file d3sm00563a1.pdf]

## Supporting Information

**Title: Soft, Flexible Pressure Sensors for Pressure Monitoring  
Under Large Hydrostatic Pressure and Harsh Ocean Environments**

*Yi Li<sup>a#</sup>, Andres Villada<sup>b#</sup>, Shao-Hao Lu<sup>a</sup>,  
He Sun<sup>c</sup>, Jianliang Xiao<sup>b\*</sup>, Xueju Wang<sup>a,d\*</sup>*

<sup>a</sup> Department of Materials Science and Engineering, University of Connecticut, Storrs, CT 06269, USA

<sup>b</sup> Department of Mechanical engineering, University of Colorado, Boulder, CO 80309, USA

<sup>c</sup> Department of Biomedical Engineering, University of Connecticut, Storrs, CT 06269, USA

<sup>d</sup> Institute of Materials Science, University of Connecticut, Storrs, CT 06269, USA

\*Corresponding author. Email: xueju.wang@uconn.edu; jianliang.xiao@colorado.edu

# Yi Li and Andres Villada contributed equally to this paper.

**Supplementary note 1:** The modulus and thickness of each layer of the temperature and salinity sensor is summarized in **Table S1**. Based on equation (1), we calculated the effective modulus for the multi-layer sensor.

$$\bar{E} = h^{-1} \left( \sum_{i=1}^N E_i h_i \right) \quad (1)$$

Here,  $h$  (21.31  $\mu\text{m}$ ) is the total thickness of the sensor, and  $h_i$  and  $E_i$  are the thickness and modulus of each layer respectively, as listed in **Table S1**. The effective modulus of the sensor is determined to be 3.66 GPa.

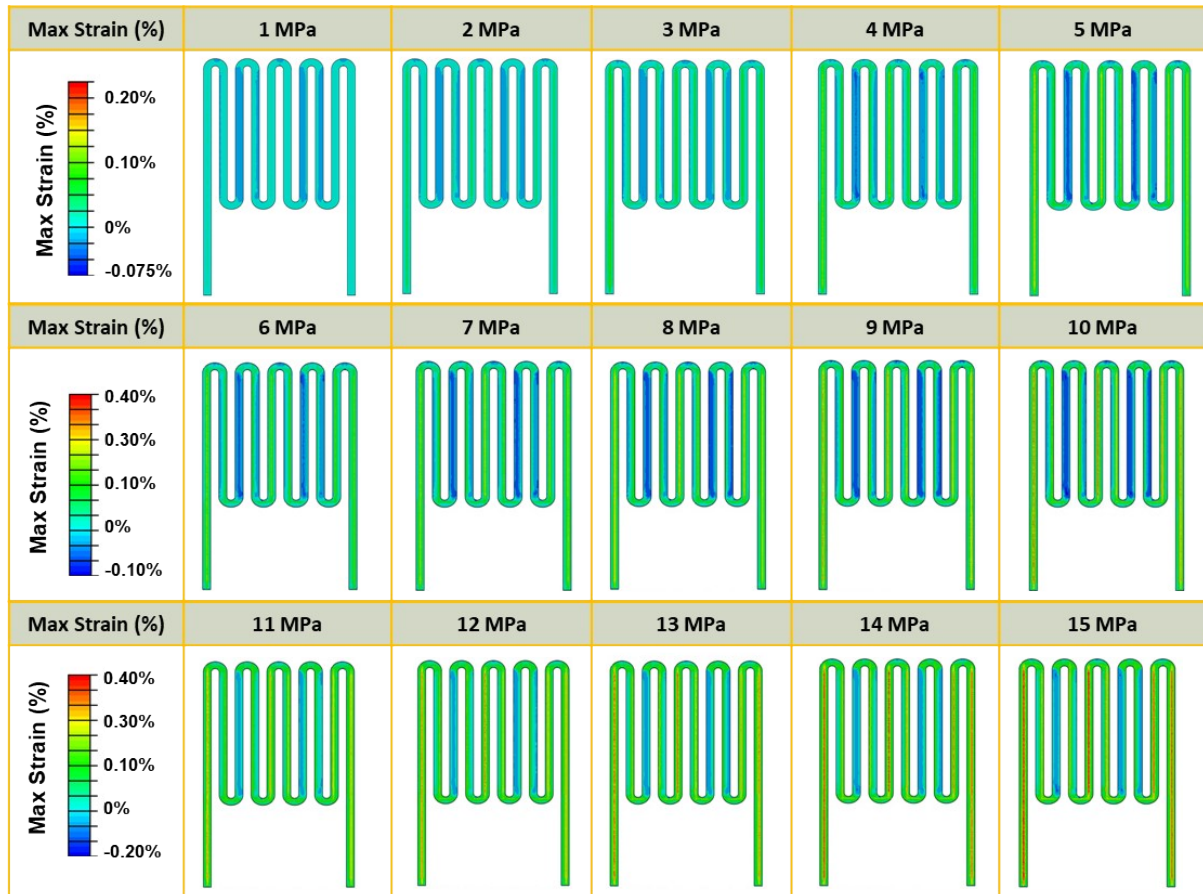

**Figure S1.** Simulation results of strain distributions in the rectangular pressure sensor under hydrostatic pressures from 1 MPa to 15 MPa.

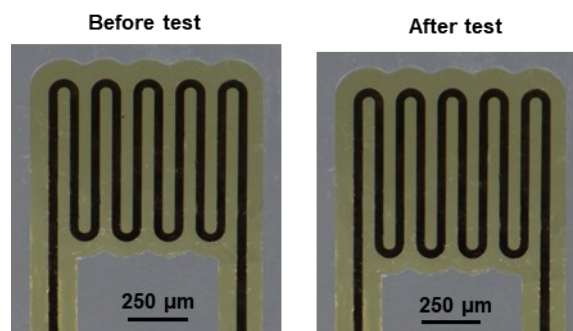

**Figure S2.** Optical microscope images show the comparison of the rectangular pressure sensor before and after cyclic loadin test.

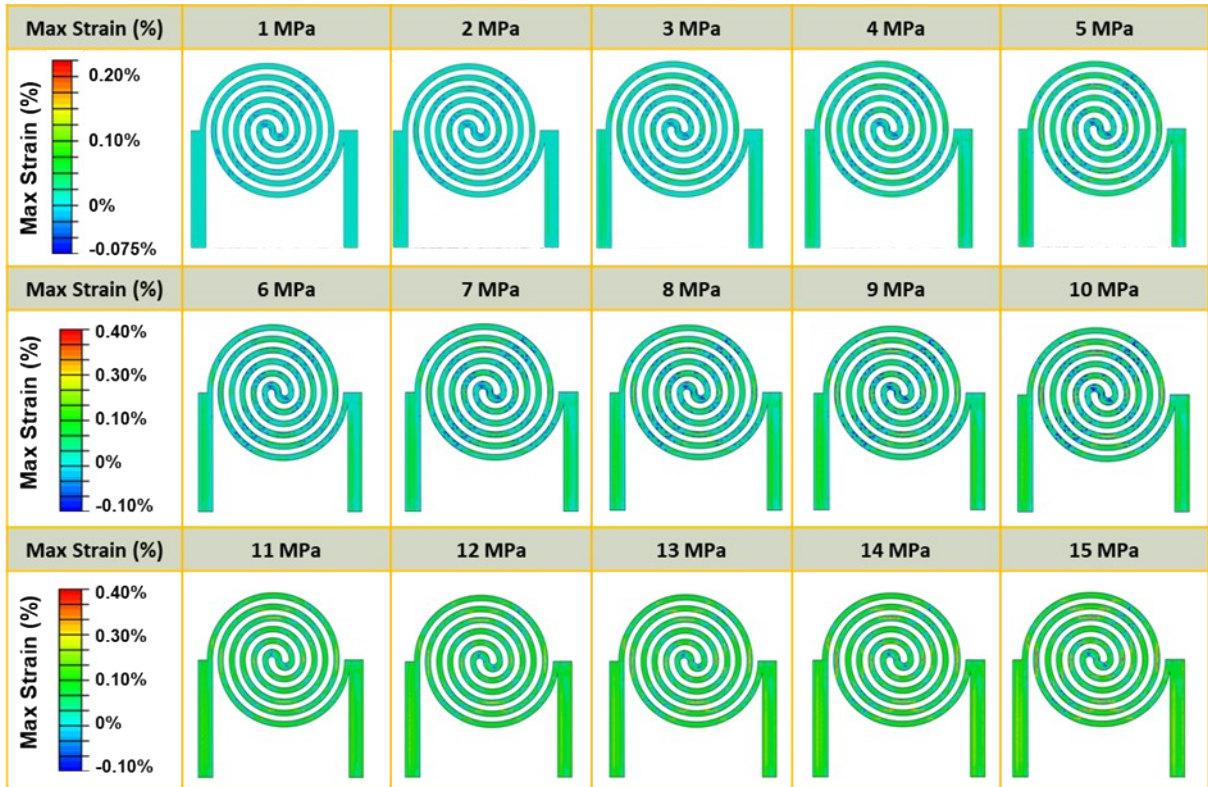

**Figure S3.** Simulation results of strain distributions in the circular pressure sensor under hydrostatic pressures from 1 MPa to 15 MPa.

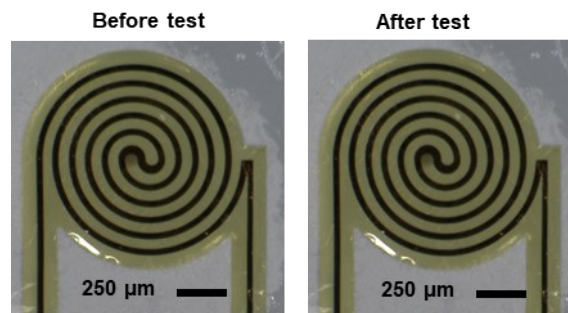

**Figure S4.** Optical microscope images show the comparison of the circular pressure sensor before and after cyclic loading test.

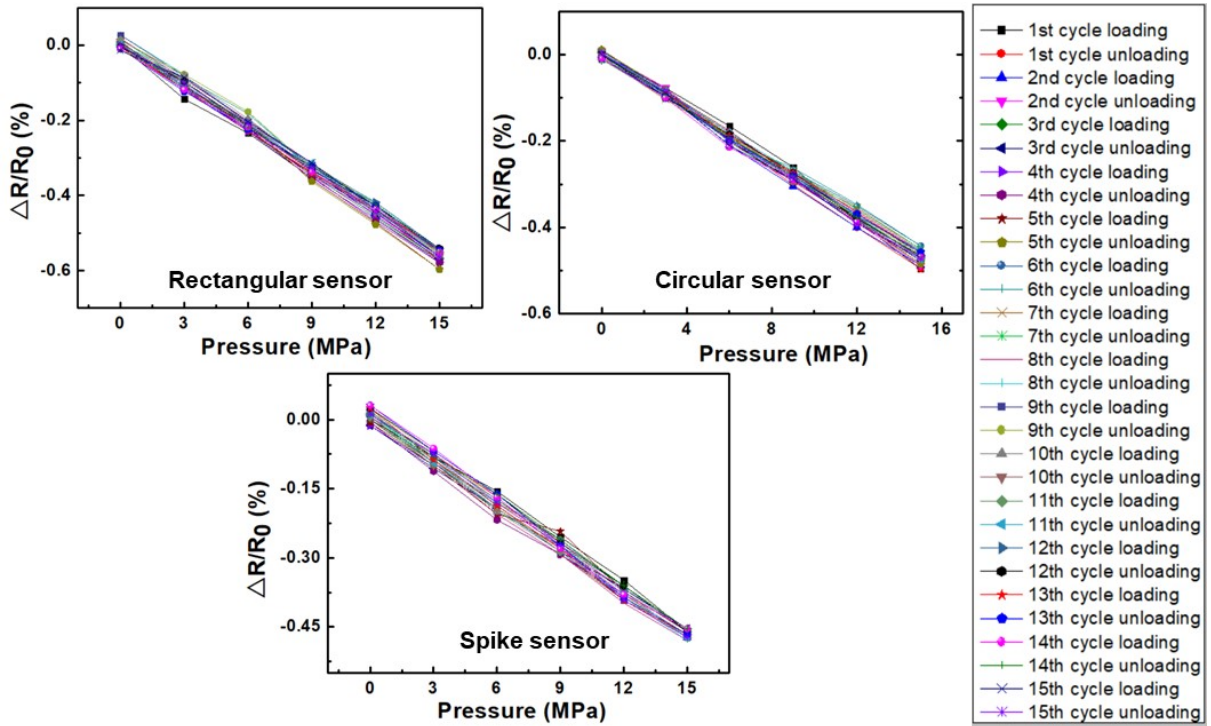

**Figure S5.** 15 cyclic loading/unloading test results of pressure sensors in rectangular, circular and spike shapes, respectively.

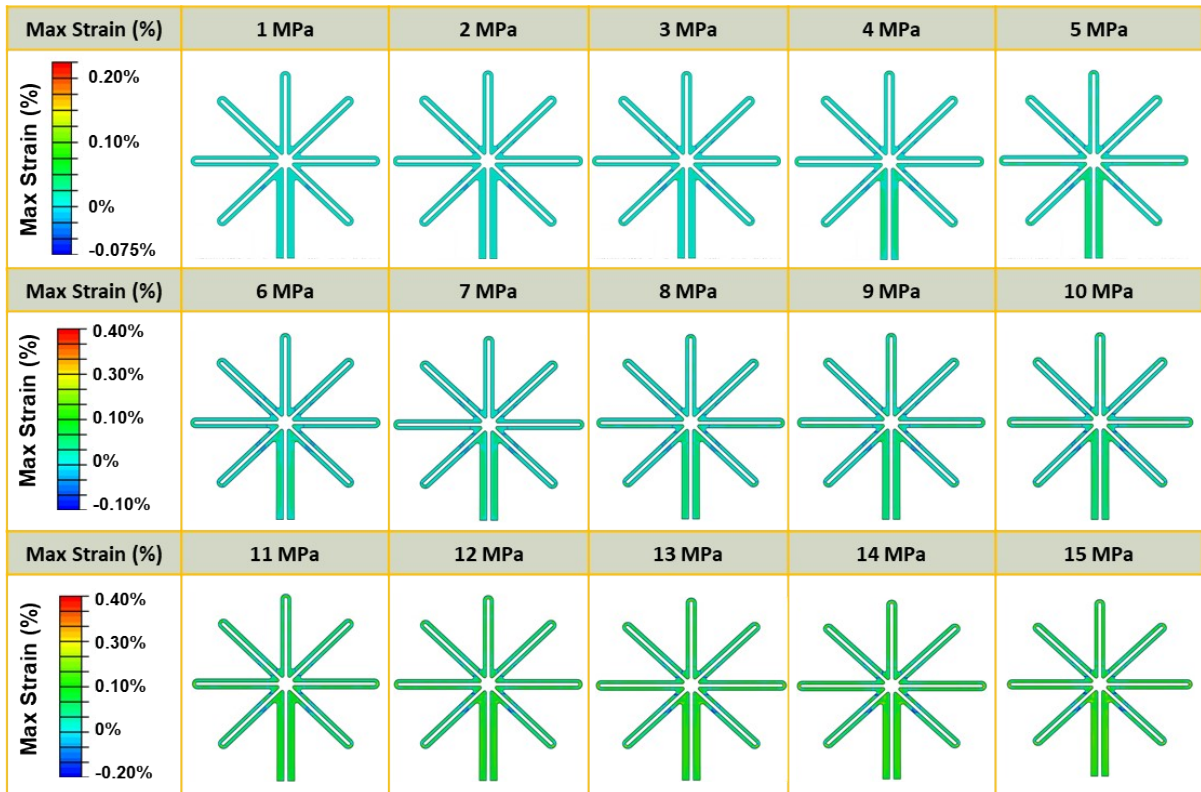

**Figure S6.** Simulation results of strain distributions in the spike pressure sensor under hydrostatic pressures from 1 MPa to 15 MPa.

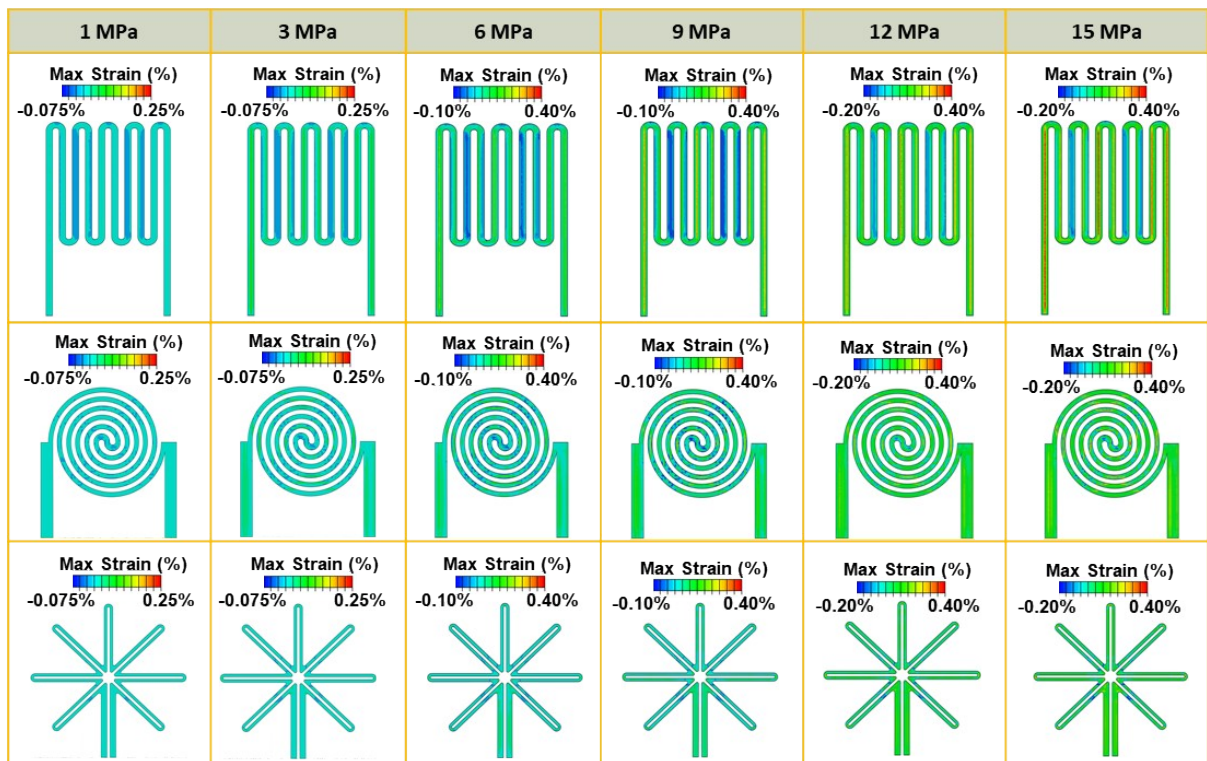

**Figure S7.** Comparison of strain distributions in the rectangular, circular, and spike pressure sensor under hydrostatic pressures from 1 MPa to 15 MPa.

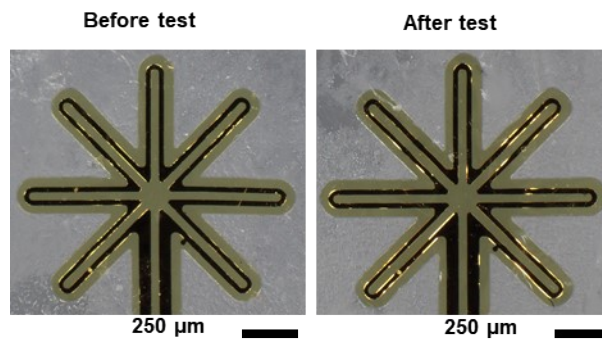

**Figure S8.** Optical microscope images show the comparison of the spike pressure sensor before and after cyclic loading test.

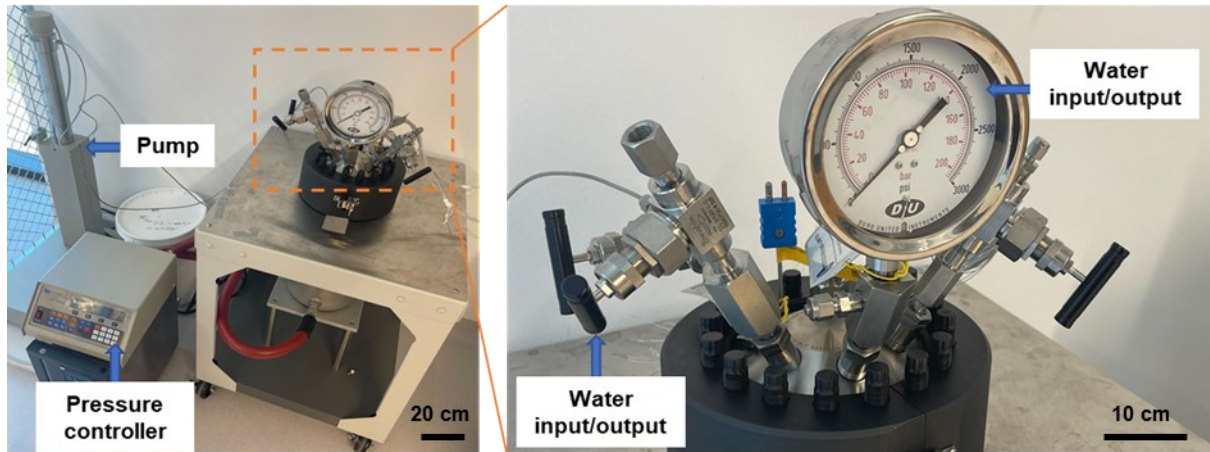

**Figure S9.** Optical image of the setup for the pressure vessel, pump, and chiller.

**Table S1.** The modulus and thickness of each layer of the sensor.

| Layers                              | Young's modulus (MPa) |
|-------------------------------------|-----------------------|
| Polyimide (7.6 $\mu\text{m}$ thick) | 2500                  |
| Cr (10 nm thick)                    | 140000                |
| Au (100 nm thick)                   | 78000                 |
| Polyimide (7.6 $\mu\text{m}$ thick) | 4020                  |
| Parylene C (6 $\mu\text{m}$ thick)  | 3200                  |
